# Supplementary material for: Self-reported Improvement in Side Effects and Quality of Life With Integrative Medicine in Breast Cancer Patients
Source: PubMed Central journal article supplement — Integr Cancer Ther. 2018 May 30;17(3):941–51. doi: 10.1177/1534735418777883 (PMC6142097; doi:10.1177/1534735418777883), 2018-05-30
Supplement: Appendix1_IMed_FU_Questionnaire_revised.pdf [file Appendix1_IMed_FU_Questionnaire_revised.pdf]

To be filled in by the interviewer!

Patient Name:

Date of Birth:

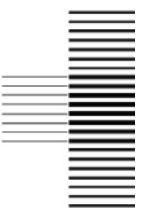

**Patient Survey**

**Follow-up Questionnaire on the Integrative Medicine Consultancy Service (IMed Consultancy Service)**

1. In the integrative medicine consultancy service you were provided a holistic naturopathic treatment concept. How well could you integrate the therapy recommendations into your everyday life? Please assign grades.

|                          |                          |                          |                          |                          |                          |                          |
|--------------------------|--------------------------|--------------------------|--------------------------|--------------------------|--------------------------|--------------------------|
| 1                        | 2                        | 3                        | 4                        | 5                        | 6                        | 0                        |
| (very satisfied)         | (satisfied)              | (partly satisfied)       | (partly dissatisfied)    | (dissatisfied)           | (very dissatisfied)      | (don't know)             |
| <input type="checkbox"/> |

2. In the integrative medicine consultancy service you received the following treatment recommendations. (see treatment plan, every individual recommendation should be assessed)

Do you still apply the recommended treatment?  
If not, for how long did you apply the recommended treatment?

|                                    |                                                                                     |
|------------------------------------|-------------------------------------------------------------------------------------|
| Treatment recommendation:<br>_____ | <input type="checkbox"/> Yes                                                        |
|                                    | <input type="checkbox"/> No, I have applied the recommended treatment for ___ weeks |
| Treatment recommendation:<br>_____ | <input type="checkbox"/> Yes                                                        |
|                                    | <input type="checkbox"/> No, I have applied the recommended treatment for ___ weeks |
| Treatment recommendation:<br>_____ | <input type="checkbox"/> Yes                                                        |
|                                    | <input type="checkbox"/> No, I have applied the recommended treatment for ___ weeks |
| Treatment recommendation:<br>_____ | <input type="checkbox"/> Yes                                                        |
|                                    | <input type="checkbox"/> No, I have applied the recommended treatment for ___ weeks |
| Treatment recommendation:<br>_____ | <input type="checkbox"/> Yes                                                        |
|                                    | <input type="checkbox"/> No, I have applied the recommended treatment for ___ weeks |
| Treatment recommendation:<br>_____ | <input type="checkbox"/> Yes                                                        |
|                                    | <input type="checkbox"/> No, I have applied the recommended treatment for ___ weeks |
| Treatment recommendation:<br>_____ | <input type="checkbox"/> Yes                                                        |
|                                    | <input type="checkbox"/> No, I have applied the recommended treatment for ___ weeks |

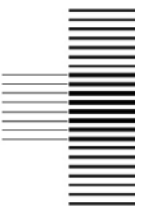

3. In the integrative medicine consultancy service you received a letter with information on your individual treatment plan. How satisfied were you with the comprehensibility of the provided information?  
Please assign grades.

|                          |                          |                          |                          |                          |                          |                          |
|--------------------------|--------------------------|--------------------------|--------------------------|--------------------------|--------------------------|--------------------------|
| 1                        | 2                        | 3                        | 4                        | 5                        | 6                        | 0                        |
| (very satisfied)         | (satisfied)              | (partly satisfied)       | (partly dissatisfied)    | (dissatisfied)           | (very dissatisfied)      | (don't know)             |
| <input type="checkbox"/> |

4. How satisfied were you with your individual treatment plan?  
Please assign grades.

|                          |                          |                          |                          |                          |                          |                          |
|--------------------------|--------------------------|--------------------------|--------------------------|--------------------------|--------------------------|--------------------------|
| 1                        | 2                        | 3                        | 4                        | 5                        | 6                        | 0                        |
| (very satisfied)         | (satisfied)              | (partly satisfied)       | (partly dissatisfied)    | (dissatisfied)           | (very dissatisfied)      | (don't know)             |
| <input type="checkbox"/> |

5. How satisfied were you with the atmosphere and surroundings in the integrative medicine consultancy service?  
Please assign grades.

|                          |                          |                          |                          |                          |                          |                          |
|--------------------------|--------------------------|--------------------------|--------------------------|--------------------------|--------------------------|--------------------------|
| 1                        | 2                        | 3                        | 4                        | 5                        | 6                        | 0                        |
| (very satisfied)         | (satisfied)              | (partly satisfied)       | (partly dissatisfied)    | (dissatisfied)           | (very dissatisfied)      | (don't know)             |
| <input type="checkbox"/> |

6. How satisfied were you with the way in which the integrative medicine consultancy service was organized?  
Please assign grades.

|                          |                          |                          |                          |                          |                          |                          |
|--------------------------|--------------------------|--------------------------|--------------------------|--------------------------|--------------------------|--------------------------|
| 1                        | 2                        | 3                        | 4                        | 5                        | 6                        | 0                        |
| (very satisfied)         | (satisfied)              | (partly satisfied)       | (partly dissatisfied)    | (dissatisfied)           | (very dissatisfied)      | (don't know)             |
| <input type="checkbox"/> |



7. Upon your first presentation in the integrative medicine consultancy service you reported the following symptoms.  
(see IMed questionnaire, each symptom should be assessed individually)

In your opinion, did the symptoms change by making use of integrative medicine?

Symptom: \_\_\_\_\_

- |                                                              |                                                          |
|--------------------------------------------------------------|----------------------------------------------------------|
| <input type="checkbox"/> Yes, symptom stopped                | <input type="checkbox"/> No, symptom unchanged           |
| <input type="checkbox"/> Yes, symptom significantly improved | <input type="checkbox"/> No, symptom slightly worse      |
| <input type="checkbox"/> Yes, symptom slightly improved      | <input type="checkbox"/> No, symptom significantly worse |
|                                                              | <input type="checkbox"/> Don't know                      |

Symptom: \_\_\_\_\_

- |                                                              |                                                          |
|--------------------------------------------------------------|----------------------------------------------------------|
| <input type="checkbox"/> Yes, symptom stopped                | <input type="checkbox"/> No, symptom unchanged           |
| <input type="checkbox"/> Yes, symptom significantly improved | <input type="checkbox"/> No, symptom slightly worse      |
| <input type="checkbox"/> Yes, symptom slightly improved      | <input type="checkbox"/> No, symptom significantly worse |
|                                                              | <input type="checkbox"/> Don't know                      |

Symptom: \_\_\_\_\_

- |                                                              |                                                          |
|--------------------------------------------------------------|----------------------------------------------------------|
| <input type="checkbox"/> Yes, symptom stopped                | <input type="checkbox"/> No, symptom unchanged           |
| <input type="checkbox"/> Yes, symptom significantly improved | <input type="checkbox"/> No, symptom slightly worse      |
| <input type="checkbox"/> Yes, symptom slightly improved      | <input type="checkbox"/> No, symptom significantly worse |
|                                                              | <input type="checkbox"/> Don't know                      |

Symptom: \_\_\_\_\_

- |                                                              |                                                          |
|--------------------------------------------------------------|----------------------------------------------------------|
| <input type="checkbox"/> Yes, symptom stopped                | <input type="checkbox"/> No, symptom unchanged           |
| <input type="checkbox"/> Yes, symptom significantly improved | <input type="checkbox"/> No, symptom slightly worse      |
| <input type="checkbox"/> Yes, symptom slightly improved      | <input type="checkbox"/> No, symptom significantly worse |
|                                                              | <input type="checkbox"/> Don't know                      |

Symptom: \_\_\_\_\_

- |                                                              |                                                          |
|--------------------------------------------------------------|----------------------------------------------------------|
| <input type="checkbox"/> Yes, symptom stopped                | <input type="checkbox"/> No, symptom unchanged           |
| <input type="checkbox"/> Yes, symptom significantly improved | <input type="checkbox"/> No, symptom slightly worse      |
| <input type="checkbox"/> Yes, symptom slightly improved      | <input type="checkbox"/> No, symptom significantly worse |
|                                                              | <input type="checkbox"/> Don't know                      |

Symptom: \_\_\_\_\_

- |                                                              |                                                          |
|--------------------------------------------------------------|----------------------------------------------------------|
| <input type="checkbox"/> Yes, symptom stopped                | <input type="checkbox"/> No, symptom unchanged           |
| <input type="checkbox"/> Yes, symptom significantly improved | <input type="checkbox"/> No, symptom slightly worse      |
| <input type="checkbox"/> Yes, symptom slightly improved      | <input type="checkbox"/> No, symptom significantly worse |
|                                                              | <input type="checkbox"/> Don't know                      |



8. At present do you feel impaired by any of the following symptoms?  
If yes, to what extend do you feel affected?

|                                                                                |                                 |                                     |                                       |
|--------------------------------------------------------------------------------|---------------------------------|-------------------------------------|---------------------------------------|
| <input type="checkbox"/> Tiredness/ fatigue/ lack of motivation                | <input type="checkbox"/> severe | <input type="checkbox"/> moderate   | <input type="checkbox"/> minor        |
|                                                                                | <input type="checkbox"/> always | <input type="checkbox"/> frequently | <input type="checkbox"/> infrequently |
| <input type="checkbox"/> Musculoskeletal pain<br>(e.g. back pain, muscle pain) | <input type="checkbox"/> severe | <input type="checkbox"/> moderate   | <input type="checkbox"/> minor        |
|                                                                                | <input type="checkbox"/> always | <input type="checkbox"/> frequently | <input type="checkbox"/> infrequently |
| <input type="checkbox"/> Depressive mood                                       | <input type="checkbox"/> severe | <input type="checkbox"/> moderate   | <input type="checkbox"/> minor        |
|                                                                                | <input type="checkbox"/> always | <input type="checkbox"/> frequently | <input type="checkbox"/> infrequently |
| <input type="checkbox"/> Impaired cognitive function                           | <input type="checkbox"/> severe | <input type="checkbox"/> moderate   | <input type="checkbox"/> minor        |
|                                                                                | <input type="checkbox"/> always | <input type="checkbox"/> frequently | <input type="checkbox"/> infrequently |
| <input type="checkbox"/> Climacteric complaints/ Hot flushes                   | <input type="checkbox"/> severe | <input type="checkbox"/> moderate   | <input type="checkbox"/> minor        |
|                                                                                | <input type="checkbox"/> always | <input type="checkbox"/> frequently | <input type="checkbox"/> infrequently |
| <input type="checkbox"/> Polyneuropathy                                        | <input type="checkbox"/> severe | <input type="checkbox"/> moderate   | <input type="checkbox"/> minor        |
|                                                                                | <input type="checkbox"/> always | <input type="checkbox"/> frequently | <input type="checkbox"/> infrequently |
| <input type="checkbox"/> Diarrhea                                              | <input type="checkbox"/> severe | <input type="checkbox"/> moderate   | <input type="checkbox"/> minor        |
|                                                                                | <input type="checkbox"/> always | <input type="checkbox"/> frequently | <input type="checkbox"/> infrequently |
| <input type="checkbox"/> Sleep disturbances                                    | <input type="checkbox"/> severe | <input type="checkbox"/> moderate   | <input type="checkbox"/> minor        |
|                                                                                | <input type="checkbox"/> always | <input type="checkbox"/> frequently | <input type="checkbox"/> infrequently |
| <input type="checkbox"/> Constipation                                          | <input type="checkbox"/> severe | <input type="checkbox"/> moderate   | <input type="checkbox"/> minor        |
|                                                                                | <input type="checkbox"/> always | <input type="checkbox"/> frequently | <input type="checkbox"/> infrequently |
| <input type="checkbox"/> Nausea/ emesis                                        | <input type="checkbox"/> severe | <input type="checkbox"/> moderate   | <input type="checkbox"/> minor        |
|                                                                                | <input type="checkbox"/> always | <input type="checkbox"/> frequently | <input type="checkbox"/> infrequently |
| <input type="checkbox"/> other: _____                                          | <input type="checkbox"/> severe | <input type="checkbox"/> moderate   | <input type="checkbox"/> minor        |
|                                                                                | <input type="checkbox"/> always | <input type="checkbox"/> frequently | <input type="checkbox"/> infrequently |
| <input type="checkbox"/> other: _____                                          | <input type="checkbox"/> severe | <input type="checkbox"/> moderate   | <input type="checkbox"/> minor        |
|                                                                                | <input type="checkbox"/> always | <input type="checkbox"/> frequently | <input type="checkbox"/> infrequently |
| <input type="checkbox"/> other: _____                                          | <input type="checkbox"/> severe | <input type="checkbox"/> moderate   | <input type="checkbox"/> minor        |
|                                                                                | <input type="checkbox"/> always | <input type="checkbox"/> frequently | <input type="checkbox"/> infrequently |
| <input type="checkbox"/> other: _____                                          | <input type="checkbox"/> severe | <input type="checkbox"/> moderate   | <input type="checkbox"/> minor        |
|                                                                                | <input type="checkbox"/> always | <input type="checkbox"/> frequently | <input type="checkbox"/> infrequently |
| <input type="checkbox"/> other: _____                                          | <input type="checkbox"/> severe | <input type="checkbox"/> moderate   | <input type="checkbox"/> minor        |
|                                                                                | <input type="checkbox"/> always | <input type="checkbox"/> frequently | <input type="checkbox"/> infrequently |

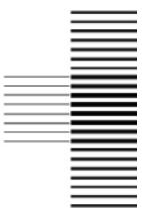

9. Upon your first presentation in the integrative medicine consultancy service you reported the following therapy goals  
(see IMed questionnaire, each therapy goal should be assessed individually)

How well could you achieve these therapy goals?  
Please assign grades.

Relief of cancer symptoms

|                          |                          |                          |                          |                          |                          |                          |
|--------------------------|--------------------------|--------------------------|--------------------------|--------------------------|--------------------------|--------------------------|
| 1                        | 2                        | 3                        | 4                        | 5                        | 6                        | 0                        |
| (very satisfied)         | (satisfied)              | (partly satisfied)       | (partly dissatisfied)    | (dissatisfied)           | (very dissatisfied)      | (don't know)             |
| <input type="checkbox"/> |

Reduction of side effects of conventional therapy

|                          |                          |                          |                          |                          |                          |                          |
|--------------------------|--------------------------|--------------------------|--------------------------|--------------------------|--------------------------|--------------------------|
| 1                        | 2                        | 3                        | 4                        | 5                        | 6                        | 0                        |
| (very satisfied)         | (satisfied)              | (partly satisfied)       | (partly dissatisfied)    | (dissatisfied)           | (very dissatisfied)      | (don't know)             |
| <input type="checkbox"/> |

Improvement of disease related quality of life

|                          |                          |                          |                          |                          |                          |                          |
|--------------------------|--------------------------|--------------------------|--------------------------|--------------------------|--------------------------|--------------------------|
| 1                        | 2                        | 3                        | 4                        | 5                        | 6                        | 0                        |
| (very satisfied)         | (satisfied)              | (partly satisfied)       | (partly dissatisfied)    | (dissatisfied)           | (very dissatisfied)      | (don't know)             |
| <input type="checkbox"/> |

Improvement in coping with the disease

|                          |                          |                          |                          |                          |                          |                          |
|--------------------------|--------------------------|--------------------------|--------------------------|--------------------------|--------------------------|--------------------------|
| 1                        | 2                        | 3                        | 4                        | 5                        | 6                        | 0                        |
| (very satisfied)         | (satisfied)              | (partly satisfied)       | (partly dissatisfied)    | (dissatisfied)           | (very dissatisfied)      | (don't know)             |
| <input type="checkbox"/> |

Stabilization of body, mind and spirit

|                          |                          |                          |                          |                          |                          |                          |
|--------------------------|--------------------------|--------------------------|--------------------------|--------------------------|--------------------------|--------------------------|
| 1                        | 2                        | 3                        | 4                        | 5                        | 6                        | 0                        |
| (very satisfied)         | (satisfied)              | (partly satisfied)       | (partly dissatisfied)    | (dissatisfied)           | (very dissatisfied)      | (don't know)             |
| <input type="checkbox"/> |

Active participation in treatment of the disease

|                          |                          |                          |                          |                          |                          |                          |
|--------------------------|--------------------------|--------------------------|--------------------------|--------------------------|--------------------------|--------------------------|
| 1                        | 2                        | 3                        | 4                        | 5                        | 6                        | 0                        |
| (very satisfied)         | (satisfied)              | (partly satisfied)       | (partly dissatisfied)    | (dissatisfied)           | (very dissatisfied)      | (don't know)             |
| <input type="checkbox"/> |

Slowing of tumor progression

|                          |                          |                          |                          |                          |                          |                          |
|--------------------------|--------------------------|--------------------------|--------------------------|--------------------------|--------------------------|--------------------------|
| 1                        | 2                        | 3                        | 4                        | 5                        | 6                        | 0                        |
| (very satisfied)         | (satisfied)              | (partly satisfied)       | (partly dissatisfied)    | (dissatisfied)           | (very dissatisfied)      | (don't know)             |
| <input type="checkbox"/> |

Prolonging survival time

|                          |                          |                          |                          |                          |                          |                          |
|--------------------------|--------------------------|--------------------------|--------------------------|--------------------------|--------------------------|--------------------------|
| 1                        | 2                        | 3                        | 4                        | 5                        | 6                        | 0                        |
| (very satisfied)         | (satisfied)              | (partly satisfied)       | (partly dissatisfied)    | (dissatisfied)           | (very dissatisfied)      | (don't know)             |
| <input type="checkbox"/> |



10. What therapy goals would you like to achieve from **today's** perspective? Please tick any of the following boxes.

- Relief of cancer symptoms
- Reduction of side effects of conventional therapy
- Improvement of disease related quality of life
- Improvement in coping with the disease
- Stabilization of body, mind and spirit
- Active participation in treatment of the disease
- Slowing of tumor progression
- Prolonging survival time

11. How satisfied were you with the overall concept of the integrative medicine consultancy service?  
Please assign grades.

- |                          |                          |                          |                          |                          |                          |                          |
|--------------------------|--------------------------|--------------------------|--------------------------|--------------------------|--------------------------|--------------------------|
| 1                        | 2                        | 3                        | 4                        | 5                        | 6                        | 0                        |
| (very satisfied)         | (satisfied)              | (partly satisfied)       | (partly dissatisfied)    | (dissatisfied)           | (very dissatisfied)      | (don't know)             |
| <input type="checkbox"/> |

12. How much money did you approximately spend on integrative treatments per month?

Approximately \_\_\_\_\_ Euro

13. What suggestions or wishes do you have to improve the integrative medicine consultancy service?

---

---

---

---

---
